# Supplementary material for: Elastic/viscoelastic polymer bilayers: a model-based approach to stretch-responsive constructs
Source: Royal Society of Chemistry journal article supplement (doi:10.1039/d3sm01004j), 2023-12-06
Supplement: d3sm01004j1.pdf [file d3sm01004j1.pdf]

# Electronic Supplementary Information

## **Elastic/viscoelastic polymer bilayers: A model-based approach to intelligent stretchable constructs**

Austin S. Mills,<sup>‡\*a</sup> Evan Chou,<sup>‡b</sup> Zachary Baierl,<sup>b</sup> Kathryn A. Daltorio,<sup>\*a</sup> and Gary E. Wnek,<sup>\*b</sup>

<sup>‡</sup> Shared first authors

<sup>\*</sup> Corresponding authors

<sup>a</sup> Department of Mechanical and Aerospace Engineering, Case Western Reserve University, Cleveland, Ohio, USA. E-mail: austin.mills@case.edu, kathryn.daltorio@case.edu

<sup>b</sup> Department of Macromolecular Science and Engineering, Case Western Reserve University, Cleveland, Ohio, USA. E-mail: gary.wnek@case.edu

Supporting Movie S1. Bilayer cross grasping and lifting a foam piece following tensioning and release.  
 Supporting Movie S2. Bilayer curvature testing for a 20 mm extension at an extension rate of 2 mm/s and a 60 s hold.

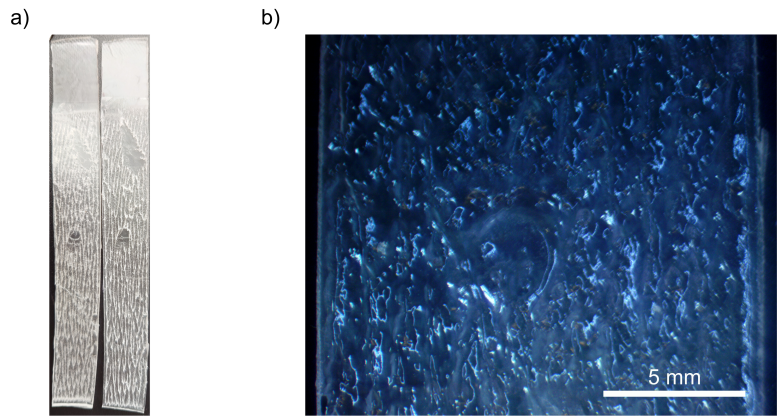

Fig. S1 SEPS-butyl trilayer post adhesion testing photographs. a) Two halves of the SEPS-butyl trilayer shortly following T-peel test described in Subsection 2.5. b) Microscope imaging of one half of the SEPS-butyl trilayer (magnification factor 4x). Note that the raised bumps are the butyl after undergoing cohesive failure. An air pocket can also be observed.

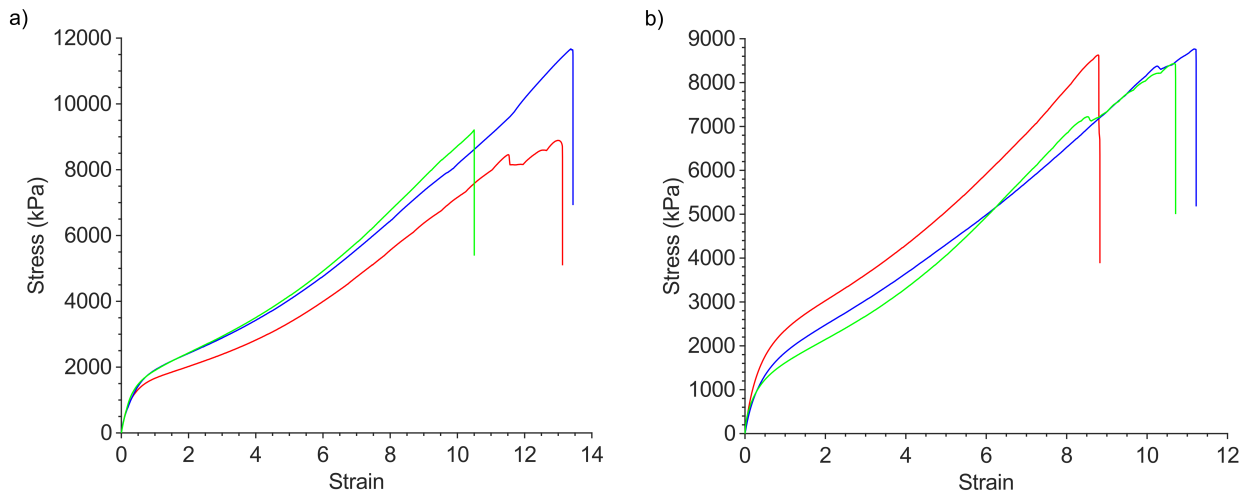

Fig. S2 a) SEPS 2002 and b) SEPS 2004 tensile engineering stresses as a function of engineering strain until failure at 0.50 mm/s extension rate ( $\dot{\epsilon} = 0.037$  1/s).

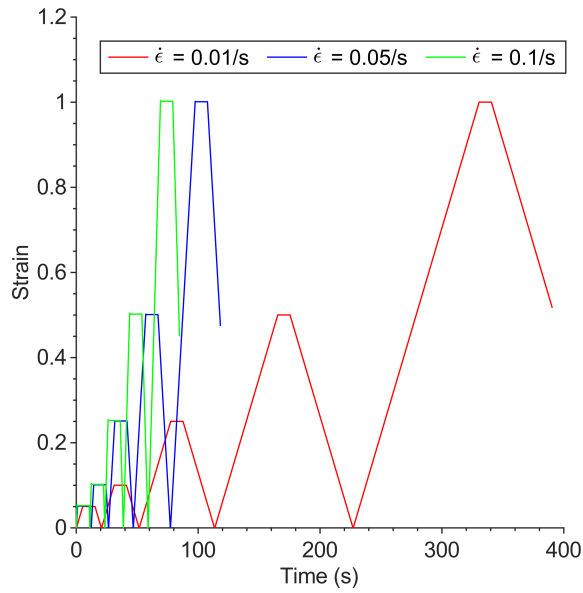

Fig. S3 butyl cyclic uniaxial tension controlled engineering strain over time at varying engineering strain rates  $\dot{\epsilon}$ .

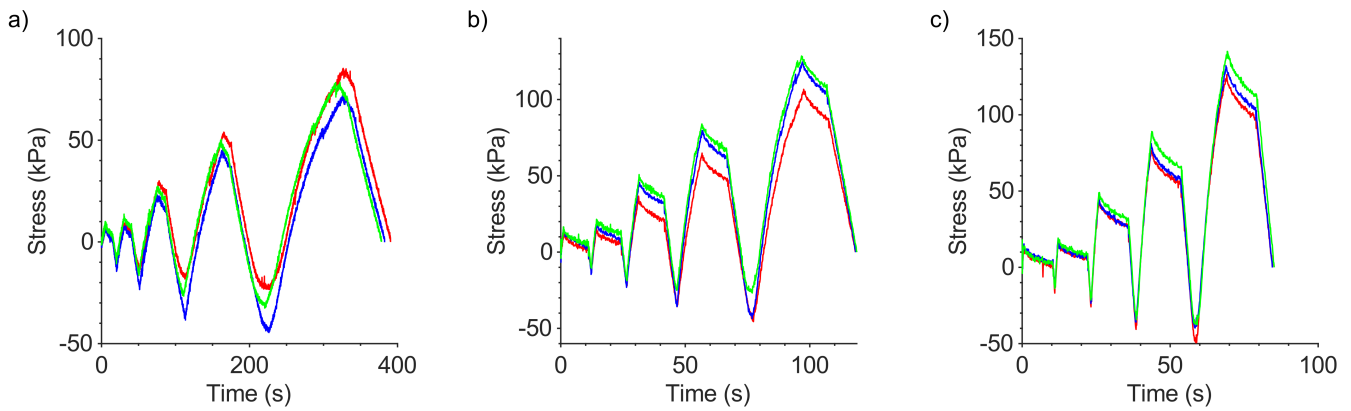

Fig. S4 butyl cyclic uniaxial tension engineering stresses over time at a) 0.01 1/s, b) 0.05 1/s, and c) 0.1 1/s engineering strain rates,  $\dot{\epsilon}$ .

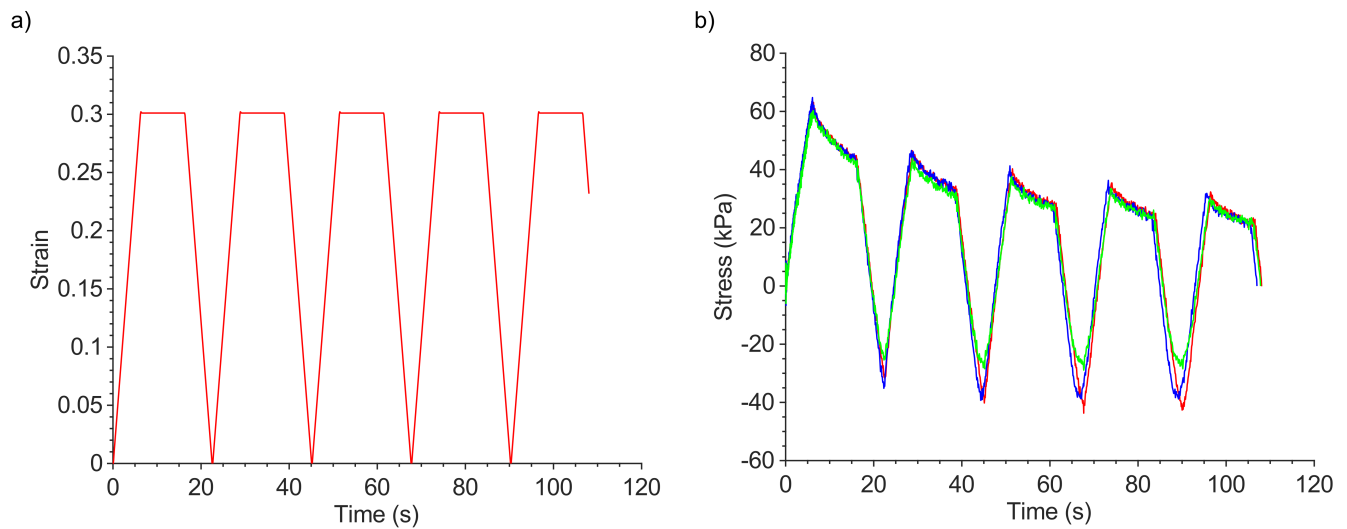

Fig. S5 butyl cyclic uniaxial tension Mullins damage testing. a) Controlled engineering strain over time with a constant engineering strain rate,  $\dot{\epsilon}$  of 0.05 1/s. b) Mullins damage test engineering stresses over time.

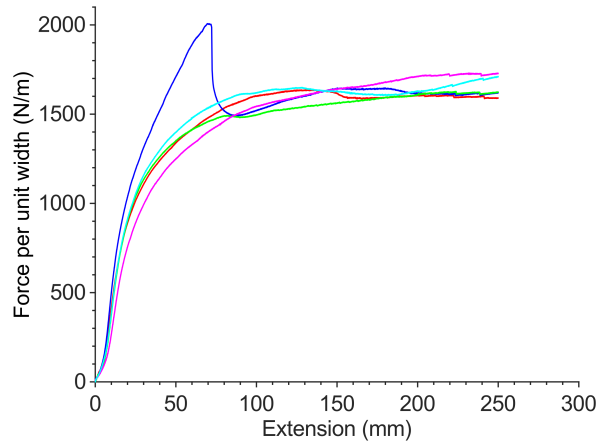

Fig. S6 SIBS-butyl adhesive testing results. Each coloured line corresponds to a different sample trial adhesive test.

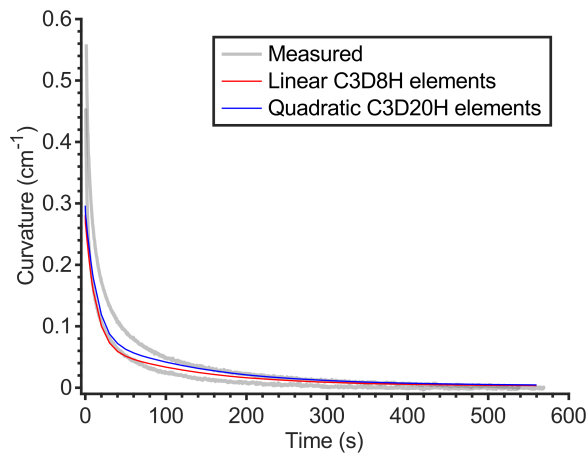

Fig. S7 Shifted measured curvatures and model predicted curvatures using 8-node linear brick and 20-node quadratic brick elements both fully integrated with a constant pressure hybrid formulation. The Generalized Maxwell model with 30 mm extension at an extension rate of 2 mm/s and a 5 s hold is shown for both element types.



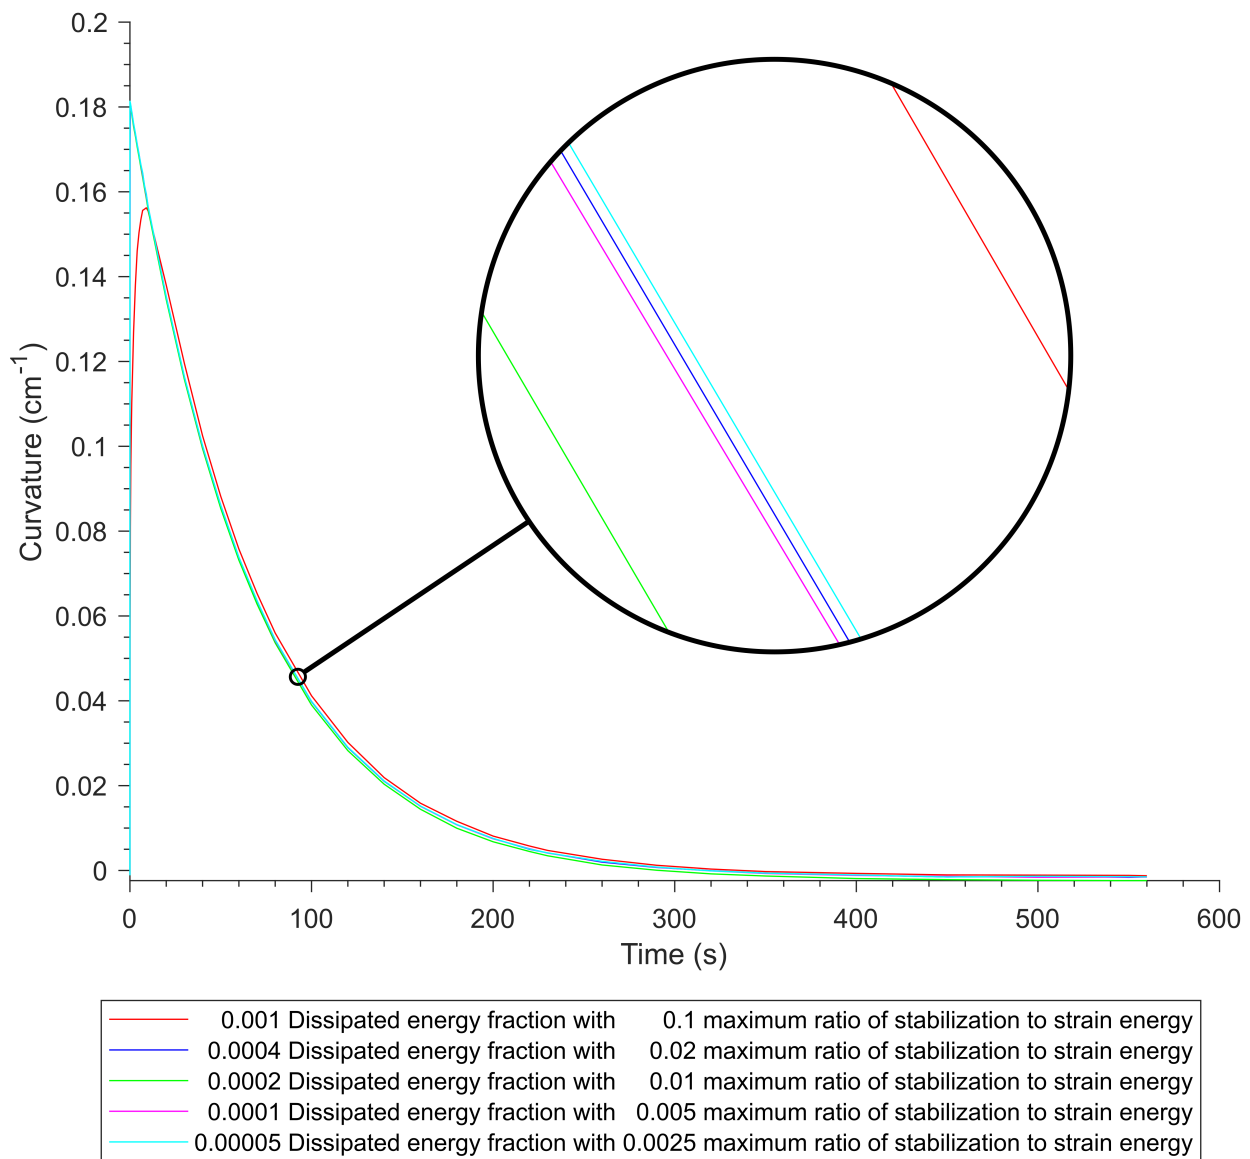

Fig. S8 Converging model predicted curvatures at varying stabilization amounts. The Maxwell model with 30 mm extension at an extension rate of 2 mm/s and a 5 s hold is shown. A 0.0001 dissipated energy fraction with a 0.005 maximum ratio of stabilization to strain energy is utilized in this work.

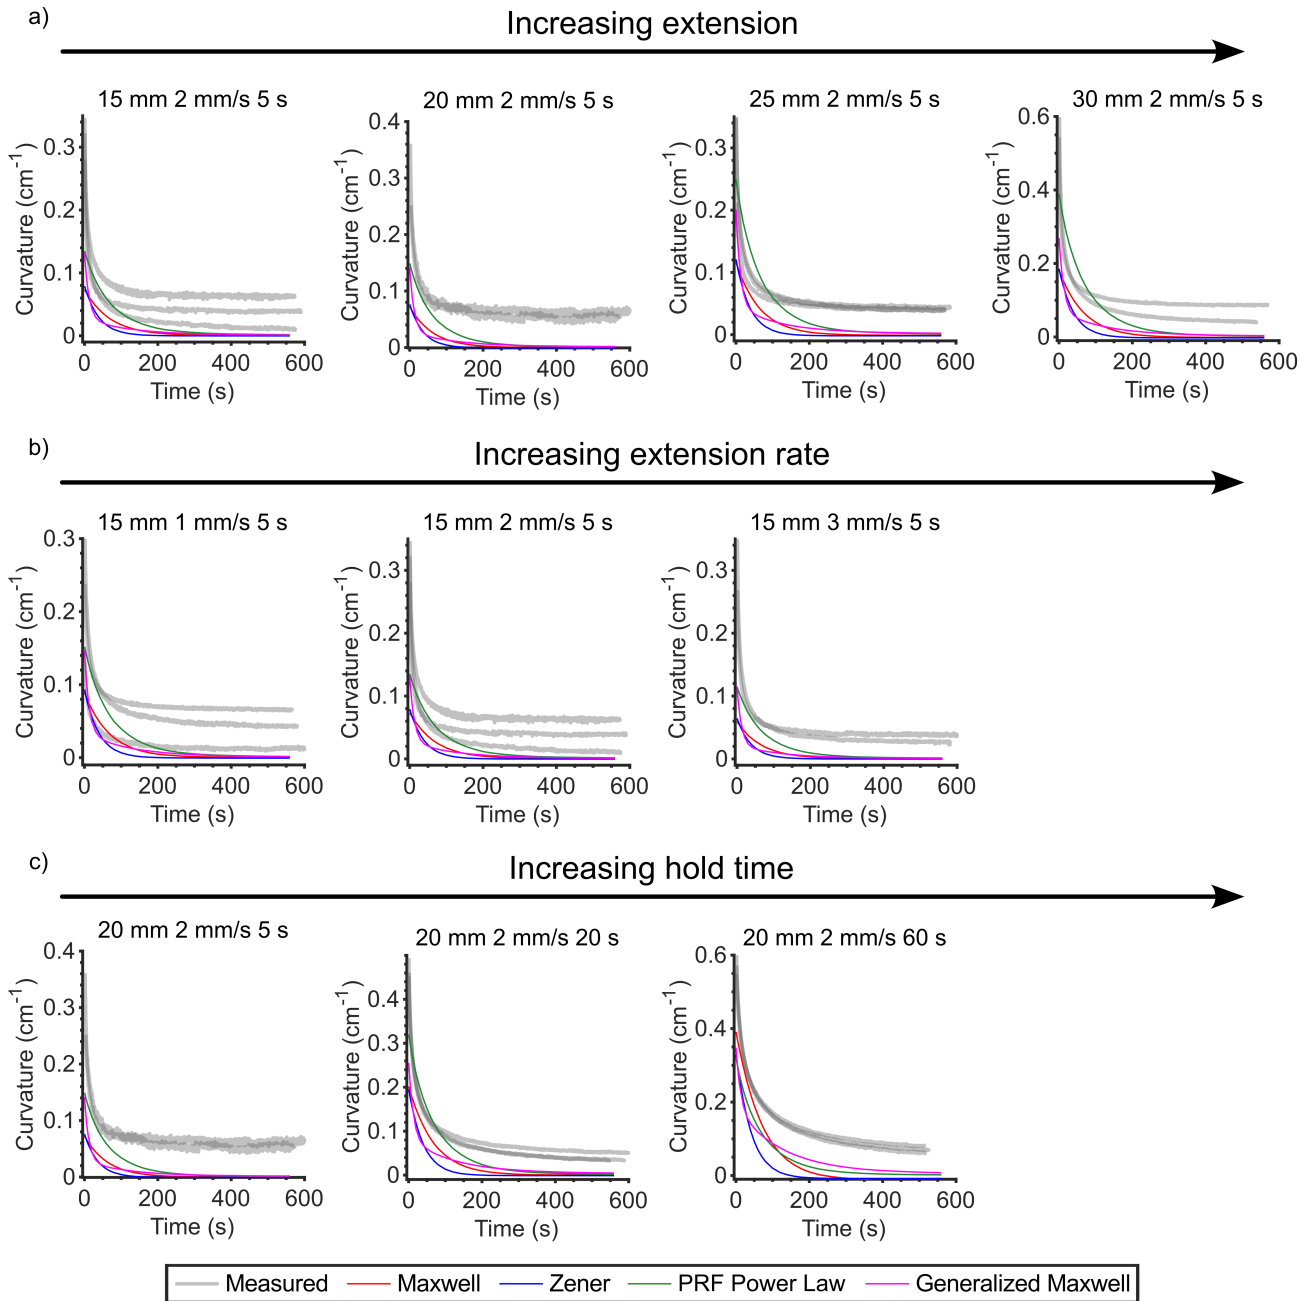

Fig. S9 Unshifted measured curvatures and model predicted curvatures at varying extensions (a), extension rates (b), and hold times (c).

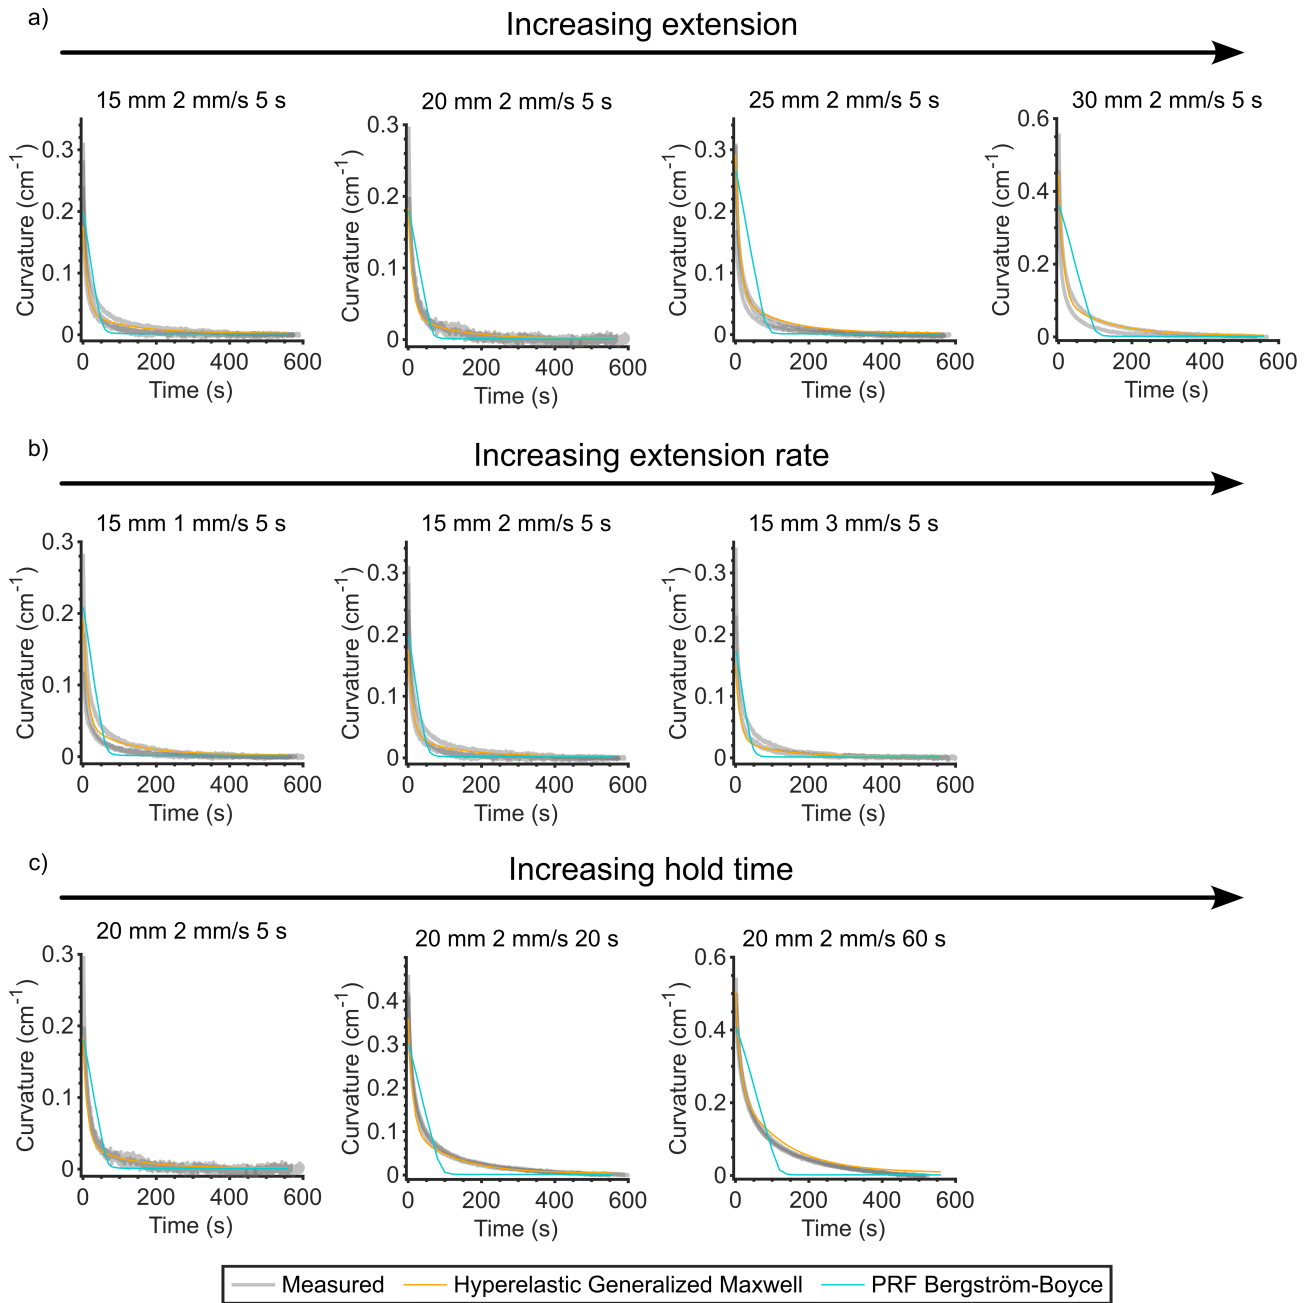

Fig. S10 Shifted measured curvatures and model predicted curvatures for hyperelastic Generalized Maxwell and PRF Bergström-Boyce models at varying extensions (a), extension rates (b), and hold times (c).

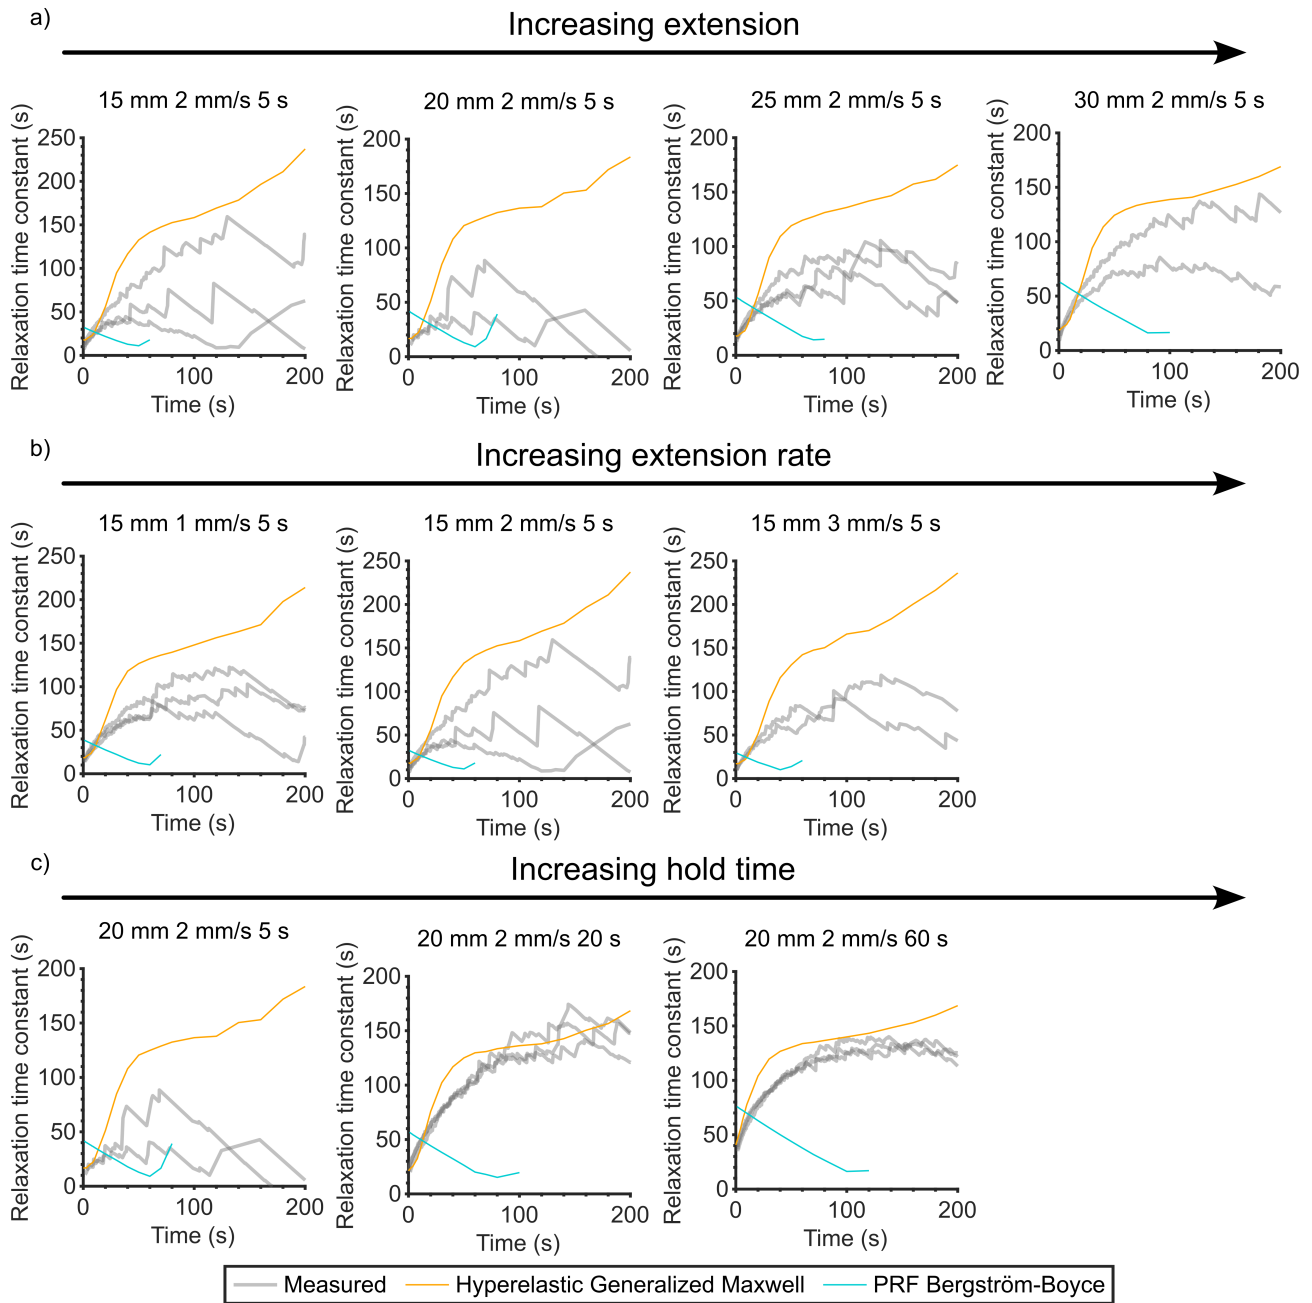

Fig. S11 Curvature relaxation time constant results for shifted measured data and hyperelastic Generalized Maxwell and PRF Bergström-Boyce models at varying extensions (a), extension rates (b), and hold times (c).

Table S1 Average MASE fitnesses of predicted model curvatures to measured bilayer curvatures.

| Test Description  | Maxwell | Zener | PRF Power Law | Generalized Maxwell | Hyperelastic Generalized Maxwell | PRF Bergström-Boyce |
|-------------------|---------|-------|---------------|---------------------|----------------------------------|---------------------|
| 15 mm 1 mm/s 5 s  | 0.461   | 0.388 | 1.246         | 0.409               | 0.617                            | 0.886               |
| 15 mm 2 mm/s 5 s  | 0.419   | 0.442 | 0.835         | 0.397               | 0.427                            | 0.568               |
| 15 mm 3 mm/s 5 s  | 0.373   | 0.571 | 0.485         | 0.399               | 0.318                            | 0.472               |
| 20 mm 1 mm/s 5 s  | 0.376   | 0.532 | 0.717         | 0.436               | 0.368                            | 0.576               |
| 20 mm 2 mm/s 20 s | 0.329   | 0.665 | 0.386         | 0.314               | 0.150                            | 0.580               |
| 20 mm 2 mm/s 60 s | 0.450   | 0.751 | 0.333         | 0.206               | 0.221                            | 0.576               |
| 25 mm 2 mm/s 5 s  | 0.338   | 0.423 | 1.364         | 0.380               | 0.505                            | 0.986               |
| 30 mm 2 mm/s 5 s  | 0.374   | 0.508 | 1.122         | 0.342               | 0.417                            | 0.889               |
| Averaged          | 0.390   | 0.535 | 0.811         | 0.360               | 0.378                            | 0.692               |

Table S2 Bilayer curvature testing specimen measurements.

| Extension (mm) | Extension rate (mm/s) | Hold time (s) | Total thickness (mm) | SEPS Relative Thickness (%) | Butyl Relative Thickness (%) |
|----------------|-----------------------|---------------|----------------------|-----------------------------|------------------------------|
| 15             | 1                     | 5             | 2.3                  | 70-80                       | 30-20                        |
| 15             | 1                     | 5             | 2.3                  | 70                          | 30                           |
| 15             | 1                     | 5             | 2.3                  | 60-70                       | 40-30                        |
| 15             | 2                     | 5             | 2.2                  | 70                          | 30                           |
| 15             | 2                     | 5             | 2.2                  | 70                          | 30                           |
| 15             | 2                     | 5             | 2.2                  | 60-70                       | 40-30                        |
| 15             | 3                     | 5             | 2.2                  | 65-70                       | 35-30                        |
| 15             | 3                     | 5             | 2.2                  | 70-80                       | 30-20                        |
| 20             | 2                     | 5             | 1.85                 | 75                          | 25                           |
| 20             | 2                     | 5             | 1.83                 | 80                          | 20                           |
| 20             | 2                     | 20            | 1.87                 | 75                          | 25                           |
| 20             | 2                     | 20            | 1.91                 | 75                          | 25                           |
| 20             | 2                     | 20            | 1.91                 | 65                          | 35                           |
| 20             | 2                     | 60            | 1.82                 | 75                          | 25                           |
| 20             | 2                     | 60            | 1.85                 | 70                          | 30                           |
| 20             | 2                     | 60            | 1.84                 | 65                          | 35                           |
| 25             | 2                     | 5             | 1.85                 | 80                          | 20                           |
| 25             | 2                     | 5             | 1.88                 | 70                          | 30                           |
| 25             | 2                     | 5             | 1.90                 | 70                          | 30                           |
| 30             | 2                     | 5             | 1.78                 | 70-80                       | 30-20                        |
| 30             | 2                     | 5             | 1.80                 | 60-70                       | 40-30                        |

Table S3 FEA mass densities used for SEPS and butyl

| SEPS Mass Density (kg/m <sup>3</sup> ) | Butyl Mass Density (kg/m <sup>3</sup> ) |
|----------------------------------------|-----------------------------------------|
| 910 <sup>a</sup>                       | 910 <sup>b</sup>                        |

<sup>a</sup> Data from supplier (SEPTON® S2002, Kuraray Co., Ltd.).

<sup>b</sup> Data from supplier (Exxon™ Butyl 268, ExxonMobil).

Table S4 FEA linear elastic model parameters used for SEPS.

| Young's Modulus (Pa) | Poisson's Ratio    |
|----------------------|--------------------|
| 4696279.36           | 0.475 <sup>a</sup> |

<sup>a</sup> Assumed to match Abaqus hyperelastic default.

Table S5 FEA yeoh hyperelastic model parameters used for SEPS.

| C <sub>10</sub> | C <sub>20</sub> | C <sub>30</sub> | D <sub>1</sub> | D <sub>2</sub> | D <sub>3</sub> |
|-----------------|-----------------|-----------------|----------------|----------------|----------------|
| 374152.379      | -2509.948       | 25.7846875      | 2.53304e-08    | 0              | 0              |

Table S6 FEA maxwell model parameters used for butyl.

| Young's Modulus (Pa) | Poisson's Ratio    | G <sub>i</sub> Prony | K <sub>i</sub> Prony | τ <sub>i</sub> Prony |
|----------------------|--------------------|----------------------|----------------------|----------------------|
| 399.918534           | 0.475 <sup>a</sup> | 0.999                | 0.999                | 54.0175253           |

<sup>a</sup> Assumed to match Abaqus hyperelastic default.

Table S7 FEA zener model parameters used for butyl.

| Young's Modulus (Pa) | Poisson's Ratio    | G <sub>i</sub> Prony | K <sub>i</sub> Prony | τ <sub>i</sub> Prony |
|----------------------|--------------------|----------------------|----------------------|----------------------|
| 94253.697            | 0.475 <sup>a</sup> | 0.760068952          | -0.000284331369      | 31.3700981           |

<sup>a</sup> Assumed to match Abaqus hyperelastic default.

Table S8 FEA generalized maxwell model parameters used for butyl.

| Young's Modulus (Pa) | Poisson's Ratio    | $G_i$ Prony | $K_i$ Prony | $\tau_i$ Prony |
|----------------------|--------------------|-------------|-------------|----------------|
| 4005.38              | 0.475 <sup>a</sup> | 0.0373474   | 0           | 0.001          |
| -                    | -                  | 1.54909E-08 | 0           | 0.01           |
| -                    | -                  | 0.00413878  | 0           | 0.1            |
| -                    | -                  | 0.000230934 | 0           | 1.0            |
| -                    | -                  | 0.374465    | 0           | 10             |
| -                    | -                  | 0.456017    | 0           | 100            |
| -                    | -                  | 0.118548    | 0           | 1000           |

<sup>a</sup> Assumed to match Abaqus hyperelastic default.

Table S9 FEA PRF model Yeoh hyperelastic coefficients used for butyl.

| $C_{10}$ | $C_{20}$ | $C_{30}$  | $D_1$       | $D_2$ | $D_3$ |
|----------|----------|-----------|-------------|-------|-------|
| 41942.3  | 23530.2  | 0.0671298 | 1.34635e-08 | 0     | 0     |

Table S10 FEA PRF model viscoelastic coefficients used for butyl.

| NETWORKID | SRATIO   | LAW       | $q_0$  | $n$ | $m$        | $a$ | $\dot{\epsilon}_0$ |
|-----------|----------|-----------|--------|-----|------------|-----|--------------------|
| 1         | 0.887179 | Power Law | 574044 | 1   | -0.0612589 | 0   | 0.0576929          |

Table S11 FEA Hyperelastic generalized maxwell model Yeoh hyperelastic coefficients used for butyl.

| $C_{10}$   | $C_{20}$    | $C_{30}$   | $D_1$          | $D_2$ | $D_3$ |
|------------|-------------|------------|----------------|-------|-------|
| 54087.5985 | -385.649086 | 610.455863 | 1.34635046E-08 | 0     | 0     |

Table S12 FEA Hyperelastic generalized maxwell model parameters used for butyl.

| $G_i$ Prony | $K_i$ Prony | $\tau_i$ Prony |
|-------------|-------------|----------------|
| 0.0373474   | 0           | 0.001          |
| 1.54909E-08 | 0           | 0.01           |
| 0.00413878  | 0           | 0.1            |
| 0.000230934 | 0           | 1.0            |
| 0.374465    | 0           | 10             |
| 0.456017    | 0           | 100            |
| 0.118548    | 0           | 1000           |

Table S13 FEA PRF Bergström-Boyce model Yeoh hyperelastic coefficients used for butyl.

| $C_{10}$    | $C_{20}$     | $C_{30}$     | $D_1$       | $D_2$ | $D_3$ |
|-------------|--------------|--------------|-------------|-------|-------|
| 51879.31999 | 12423.400575 | 2.9190714574 | 1.34635e-08 | 0     | 0     |

Table S14 FEA PRF Bergström-Boyce model viscoelastic coefficients used for butyl.

| NETWORKID | SRATIO       | LAW          | $q_0$        | $m$          | $C$          | $E$          | $\dot{\epsilon}_0$ |
|-----------|--------------|--------------|--------------|--------------|--------------|--------------|--------------------|
| 1         | 0.9999948493 | BB Power Law | 182772223.14 | 1.0503379324 | -0.567767851 | 5.312947e-05 | 1                  |

Table S15 Anova test input parameters. The mean shifting amount refers to the average of how much the unshifted curvature plots were uniformly shifted along the curvature axis for all tests with the same extension, extension rate, and time held.

| Extension (mm) | Extension rate (mm/s) | Time held (s) | Mean shifting amount |
|----------------|-----------------------|---------------|----------------------|
| 15             | 1                     | 5             | 0.0409               |
| 15             | 2                     | 5             | 0.0378               |
| 15             | 3                     | 5             | 0.0321               |
| 20             | 2                     | 5             | 0.0187               |
| 20             | 2                     | 20            | 0.0391               |
| 20             | 2                     | 60            | 0.0714               |
| 25             | 2                     | 5             | 0.0424               |
| 30             | 2                     | 5             | 0.0634               |

Table S16 Anova test results for separated extension, extension rate, and time held.

|                       | Degrees of freedom | Sum of squares | Mean squares | F-statistic | P-value |
|-----------------------|--------------------|----------------|--------------|-------------|---------|
| Extension (mm)        | 3                  | 0.001070       | 0.0003568    | 1.092       | 0.3850  |
| Extension rate (mm/s) | 2                  | 0.000092       | 0.000458     | 0.140       | 0.8705  |
| Time held (s)         | 2                  | 0.004223       | 0.0021116    | 6.462       | 0.0103  |
| Residuals             | 14                 | 0.004575       | 0.0003268    |             |         |

Table S17 Anova test results for the total time under tension, including during the extension process.

|                | Degrees of freedom | Sum of squares | Mean squares | F-statistic | P-value |
|----------------|--------------------|----------------|--------------|-------------|---------|
| Total time (s) | 6                  | 0.004777       | 0.0007961    | 2.304       | 0.0889  |
| Residuals      | 15                 | 0.005183       | 0.0003455    |             |         |
